# Supplementary material
Source: publisher site journal article supplement (https://www.dovepress.com/article/531641)
Supplement: Supplementary file 1 [file 531641%20Revised%20Supplementary%20Materials.pdf]

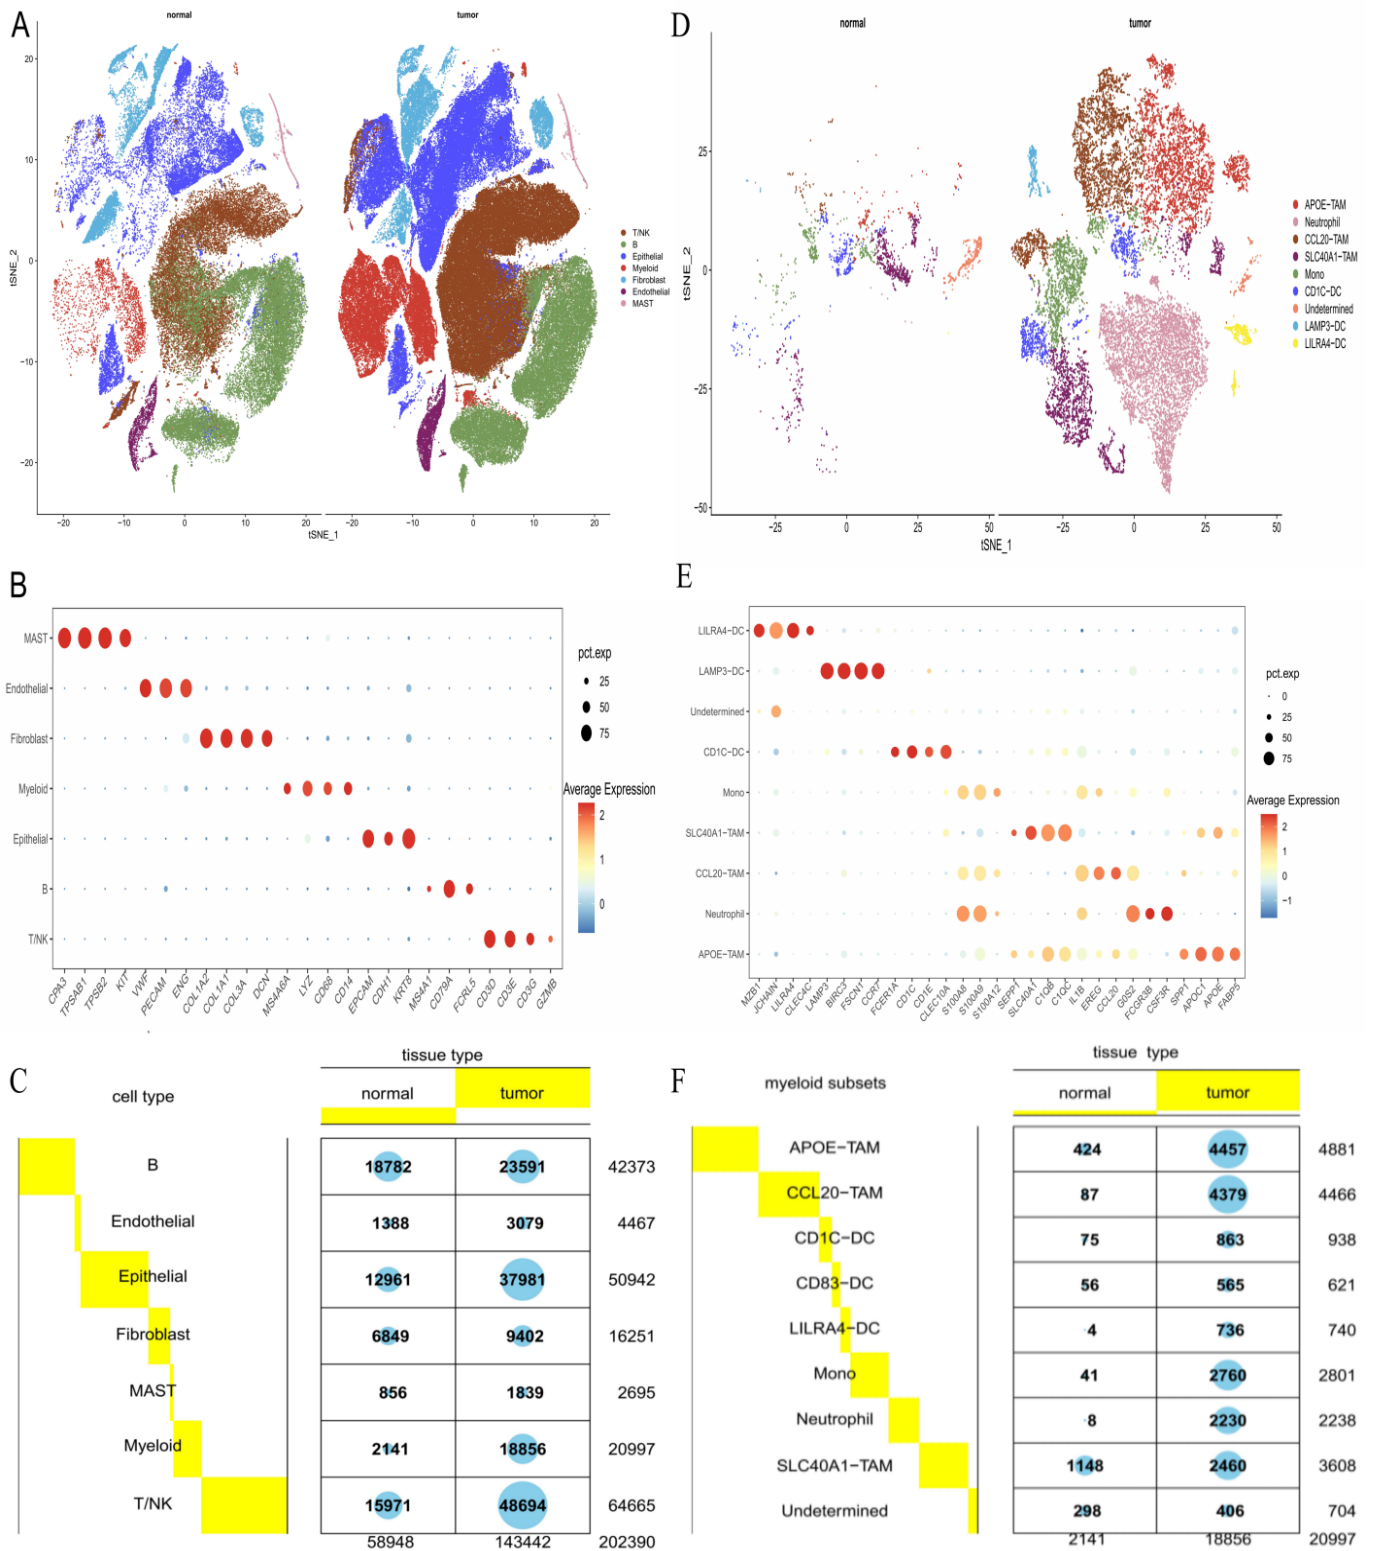

Supplementary Figure S1. The integrated single-cell atlas of primary CRC tumors and adjacent normal tissues in the validation cohort. (A) The t-SNE plot of 202390 cells. (B) Dot plot showing the marker gene expression of seven major cell types. (C) Balloon plot showing the distribution of seven major cell types between primary CRC tumors and adjacent normal tissues. (D) The t-SNE plot of 20997 myeloid cells. (E) Dot plot showing the expression of the marker genes of nine myeloid cell subsets. (F) Balloon plot showing the distribution of nine myeloid cell subsets between primary tumors and adjacent normal tissues.

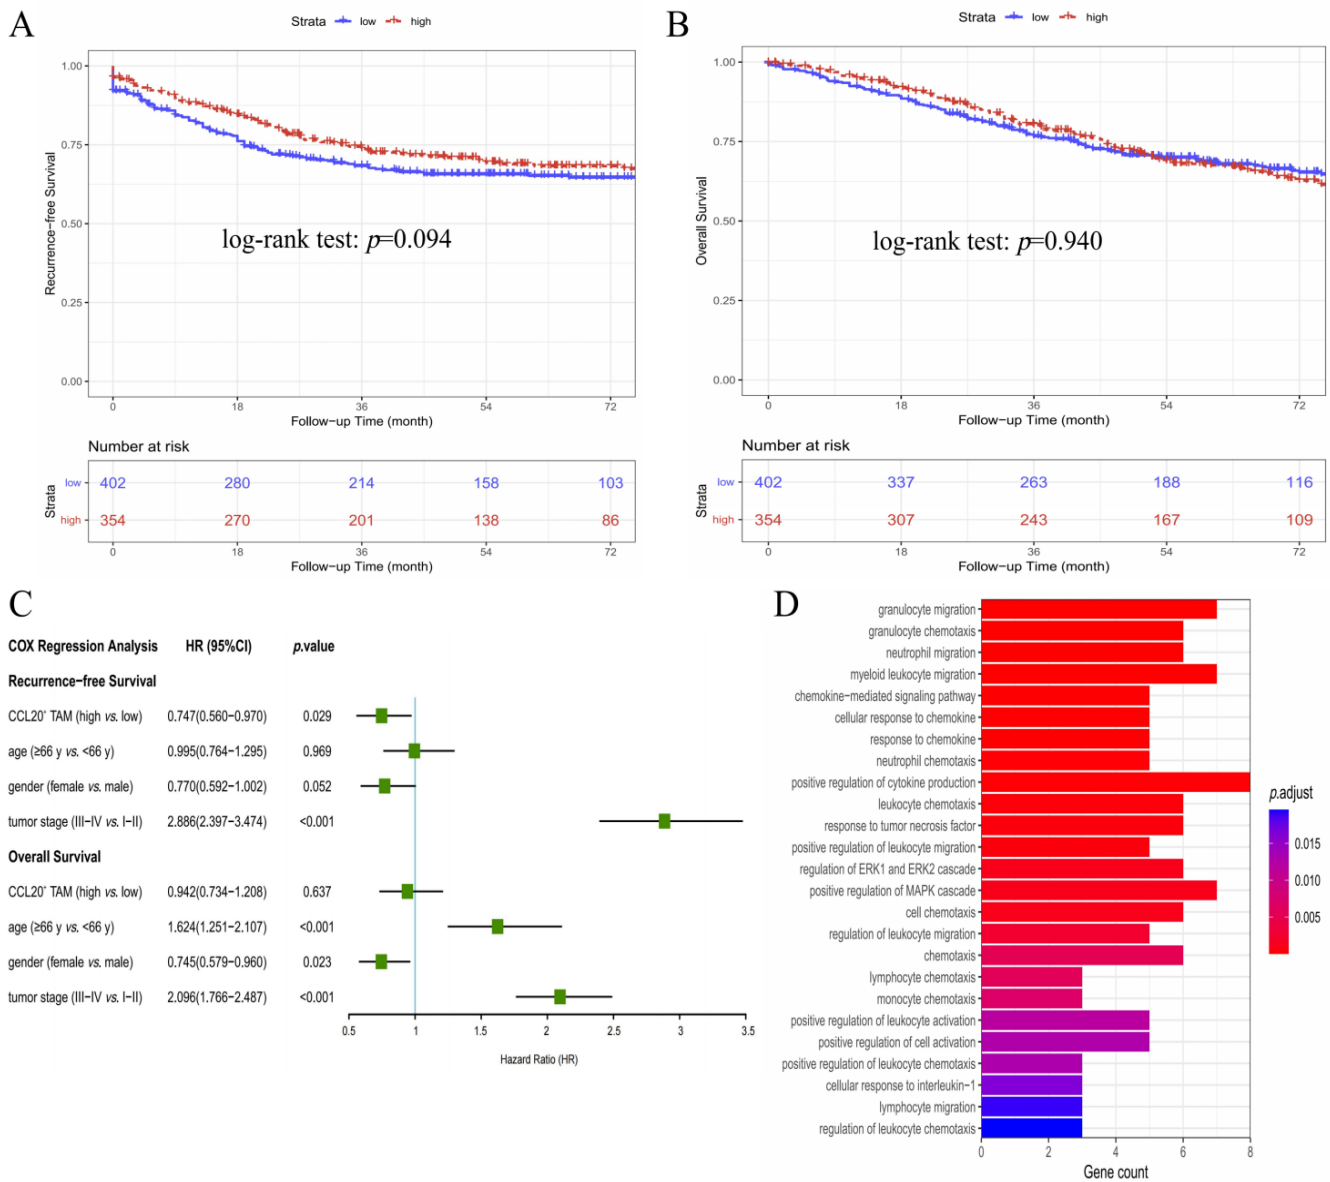

Supplementary Figure S2. Survival analysis and functional analysis of CCL20<sup>+</sup> TAMs. (A) The Kaplan–Meier curve of recurrence-free survival for CCL20<sup>+</sup> TAMs. (B) The Kaplan–Meier curve of overall survival for CCL20<sup>+</sup> TAMs. (C) The COX regression analysis of recurrence-free and overall survival for CCL20<sup>+</sup> TAMs. (D) GO analysis of CCL20<sup>+</sup> TAMs.

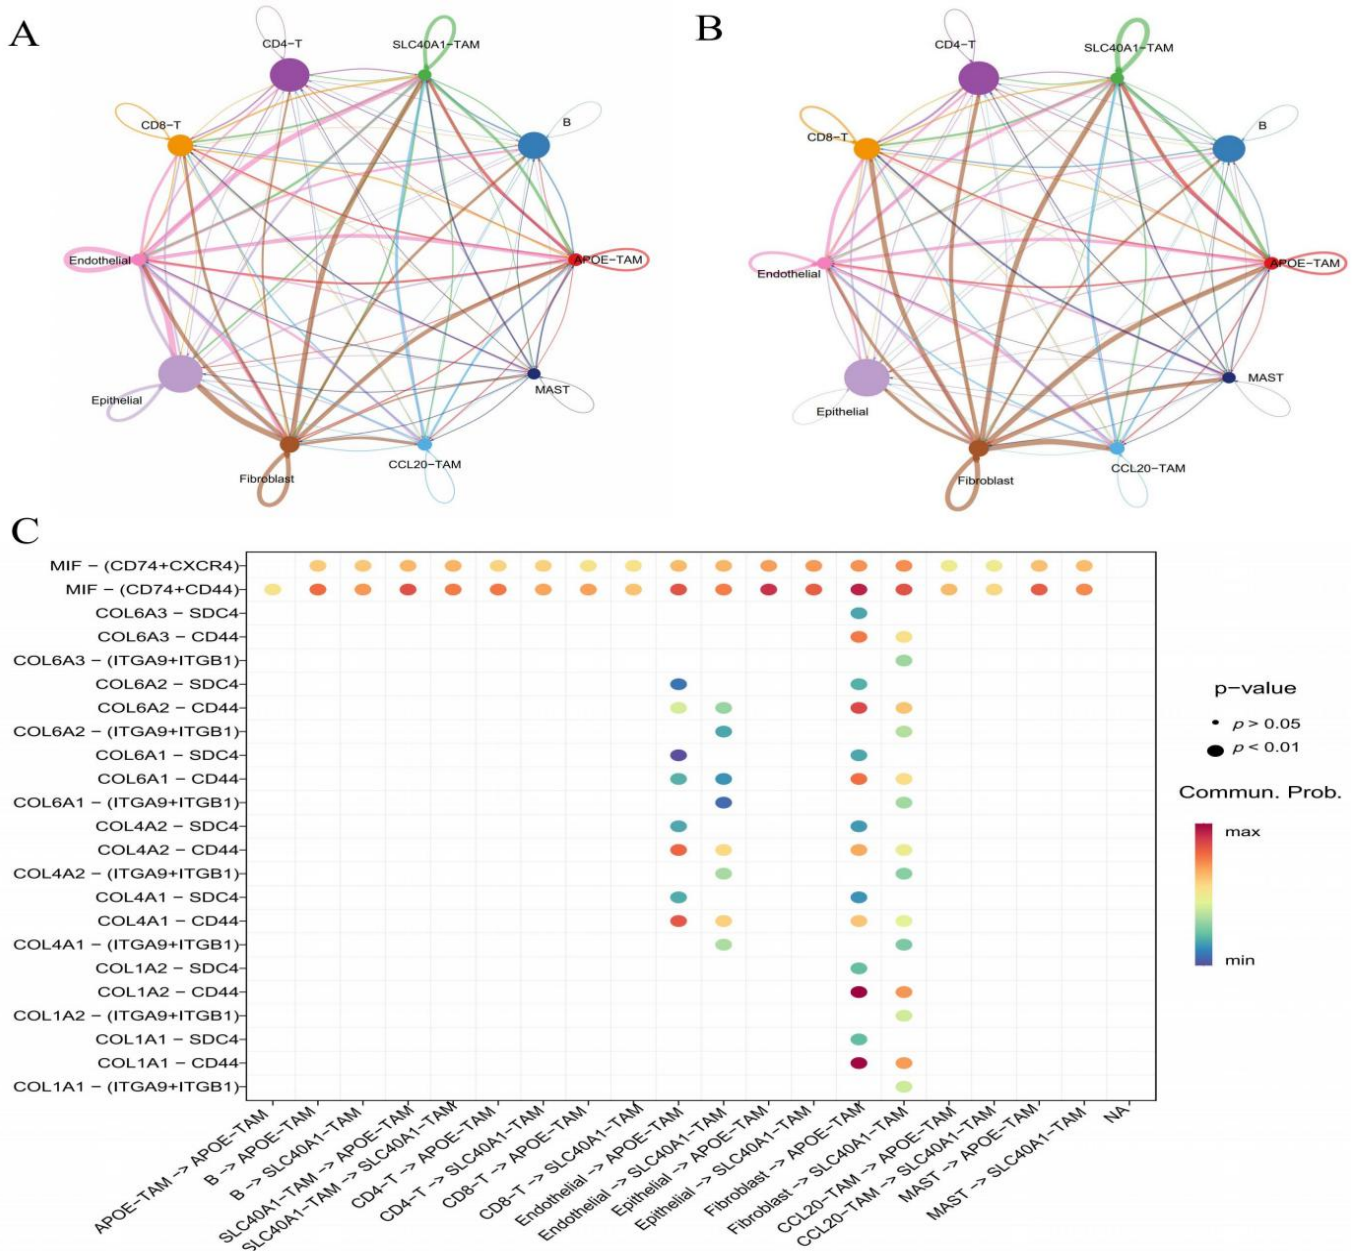

Supplementary Figure S3. Cell communication analysis between different TAM subsets and other cell types in the validation cohort. (A) Number of interactions between different cell types. (B) Strength of interactions between different cell types. (C) Dot plot of cell communications between other cell types and TAM subtypes.

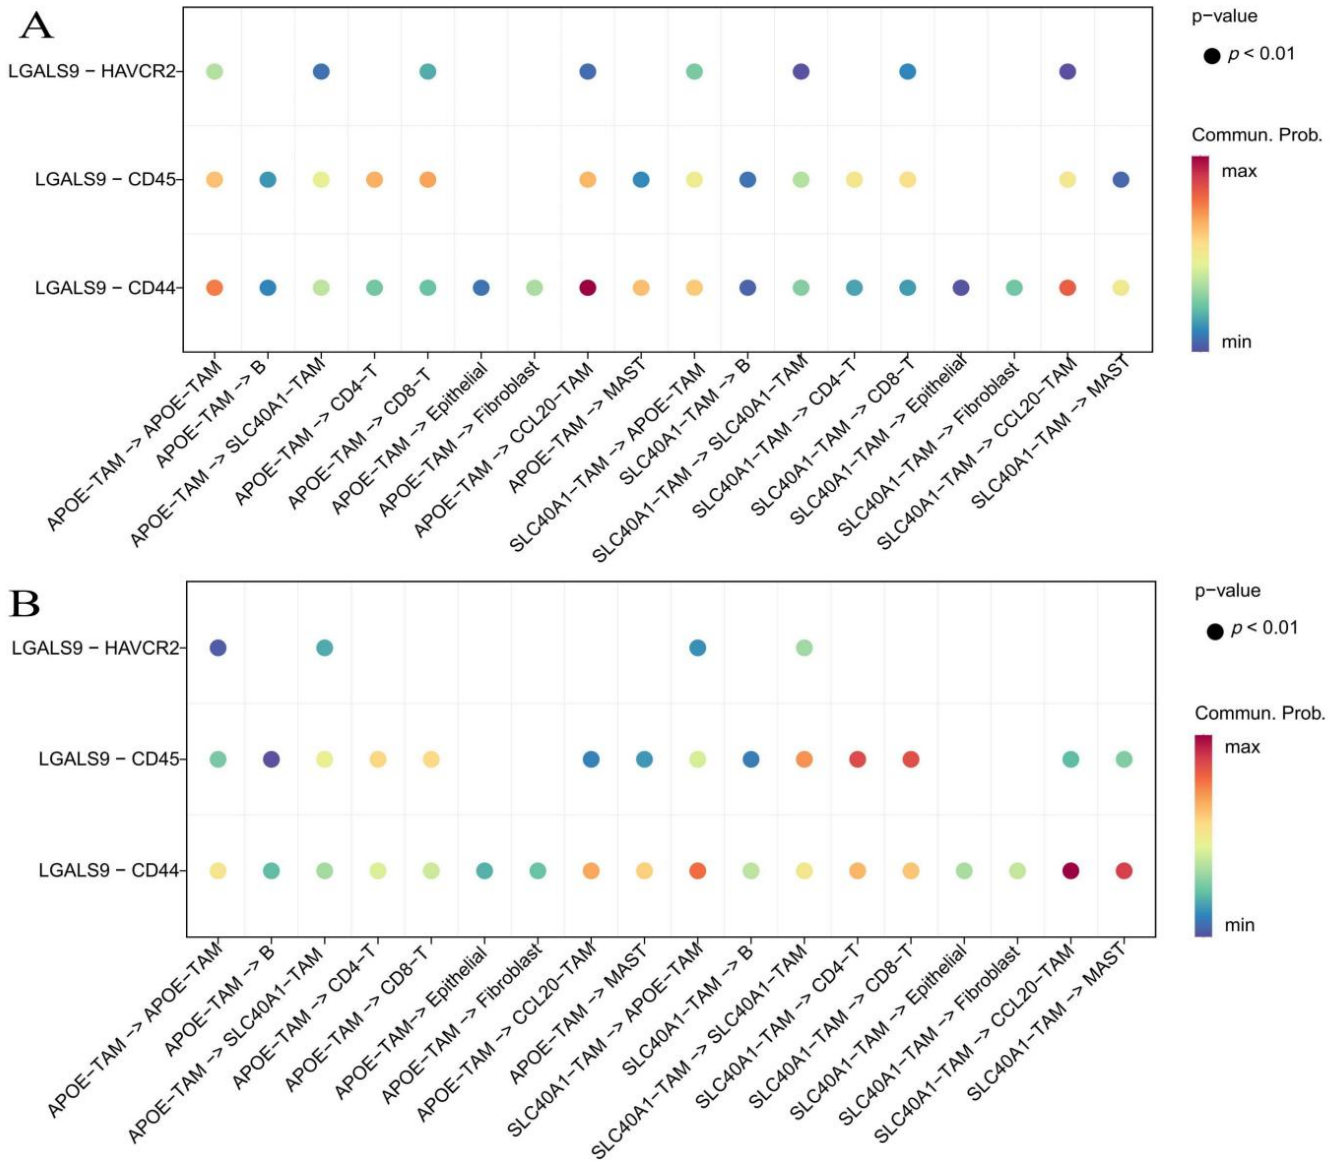

Supplementary Figure S4. Dot plot of cell communication between TAM subtypes and other cell types in the training (A) and validation (B) cohorts.

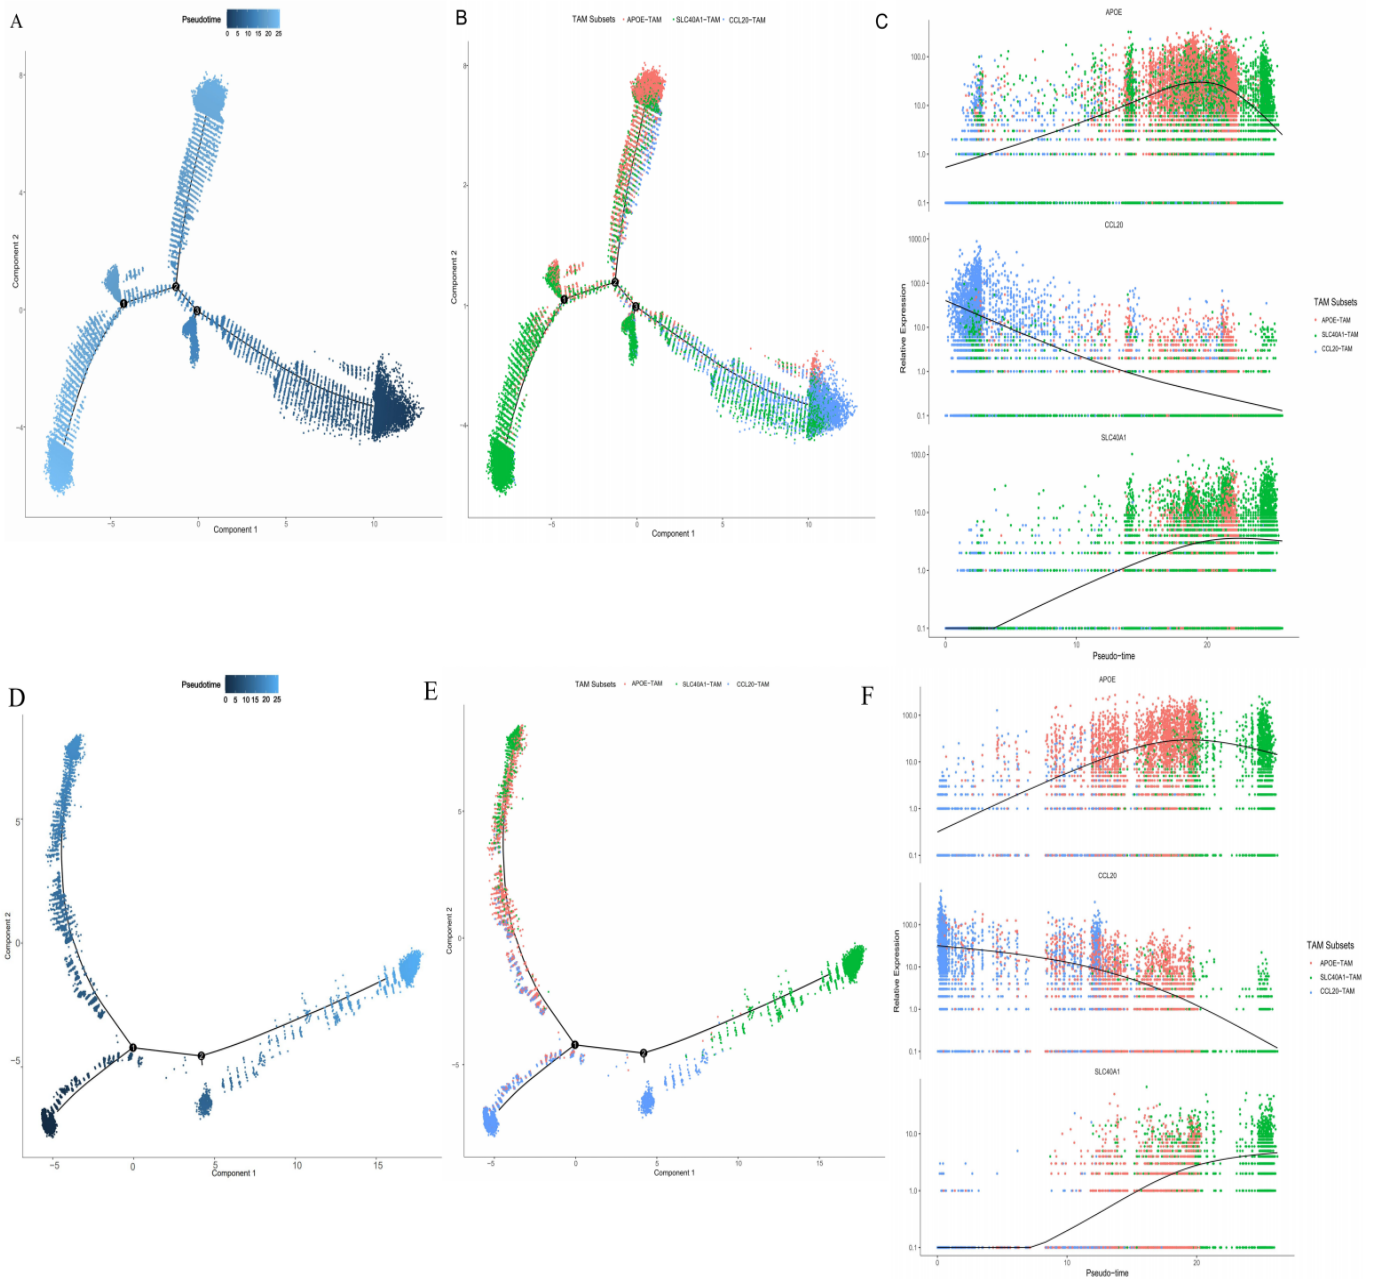

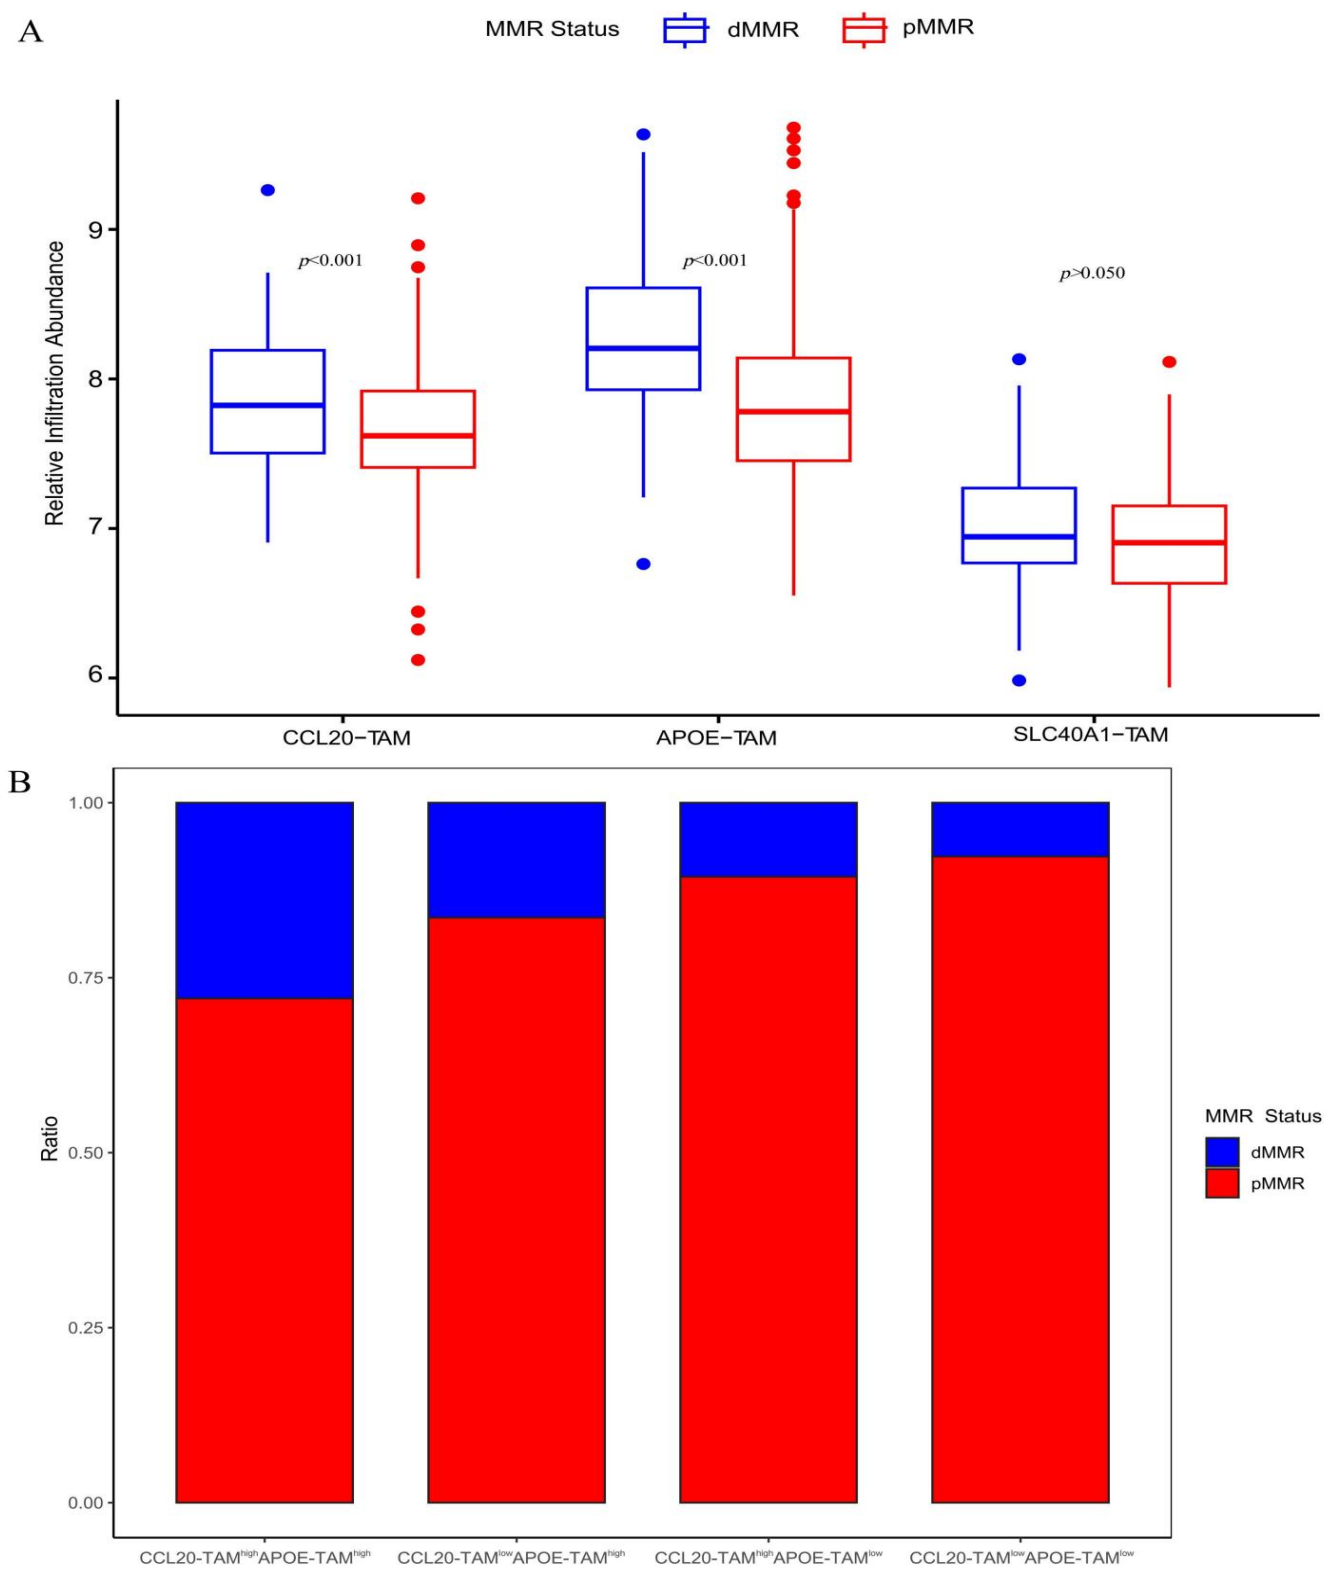

Supplementary Figure S6. The relationship of TAM subsets and MMR status in the microarray dataset. (A) The infiltration abundance of three TAM subsets between dMMR and pMMR status. (B) The proportion of dMMR status among four groups.

Supplementary Table S1. Sources of the scRNA-seq and bulk RNA-seq datasets in the discovery and validation cohorts.

| <b>Study Cohort</b> | <b>Dataset</b> | <b>Platform</b> | <b>Original</b> | <b>Number of Primary Tumor</b> | <b>Number of Normal Tissue</b> |
|---------------------|----------------|-----------------|-----------------|--------------------------------|--------------------------------|
| Training Cohort     | GSE178341      | 10x Genomics    | USA             | 129                            | 52                             |
|                     | GSE200997      | 10x Genomics    | USA             | 16                             | 7                              |
|                     | GSE231559      | 10x Genomics    | USA             | 6                              | 3                              |
| Validation Cohort   | GSE132257      | 10x Genomics    | South Korea     | 5                              | 5                              |
|                     | GSE132465      | 10x Genomics    | South Korea     | 23                             | 10                             |
|                     | GSE144735      | 10x Genomics    | South Korea     | 6                              | 6                              |
|                     | GSE221575      | 10x Genomics    | China           | 2                              | 2                              |
|                     | GSE245552      | 10x Genomics    | China           | 16                             | 4                              |
| Microarray Cohort   | GSE39582       | GPL570          | France          | 556                            | –                              |
|                     | GSE17538       | GPL570          | USA             | 200                            | –                              |

Supplementary Table S2. Canonical markers for determining seven major types and eight myeloid cell subsets in the training and validation cohorts.

| <b>Cell Types</b>                   | <b>Canonical Markers</b>     |
|-------------------------------------|------------------------------|
| <b>Seven Major Types</b>            |                              |
| T/NK cells                          | CD3D, CD3E, CD3G, GZMB       |
| B cells                             | MS4A1, CD79A, FCRL5          |
| mast cells                          | CPA3, TPSAB1, TPSB2, KIT     |
| myeloid cells                       | MS4A6A, LYZ, CD68, CD14      |
| endothelial cells                   | VWF, PECAM1, ENG             |
| epithelial cells                    | EPCAM, CDH1, KRT8            |
| fibroblasts                         | COL1A2, COL1A1, COL3A1, DCN  |
| <b>Eight Myeloid Cell Subsets</b>   |                              |
| monocyte                            | S100A8, S100A9, S100A12      |
| neutrophils                         | G0S2, FCGR3B, CSF3R          |
| CCL20 <sup>+</sup> TAMs             | CCL20, IL1B, EREG            |
| APOE <sup>+</sup> TAMs              | APOE, FABP5, SPP1, APOC1     |
| SLC40A1 <sup>+</sup> TAMs           | SLC40A1, SEPP1, C1QC, C1QB   |
| CD1C <sup>+</sup> dendritic cells   | FCER1A, CD1C, CD1E, CLEC10A  |
| LAMP3 <sup>+</sup> dendritic cells  | LAMP3, BIRC3, FSCN1, CCR7    |
| LILRA4 <sup>+</sup> dendritic cells | JCHAIN, LILRA4, CLEC4C, MZB1 |

Supplementary Table S3. all co-upregulated genes of CCL20<sup>+</sup> TAMs, APOE<sup>+</sup> TAMs, and SLC40A1<sup>+</sup> TAMs in the training and validation cohorts .

| TAM subsets               | Gene Symbol            | Discovery Cohort |       |       | Validation Cohort |       |       |       |
|---------------------------|------------------------|------------------|-------|-------|-------------------|-------|-------|-------|
|                           |                        | log2FC           | pct.1 | pct.2 | log2FC            | pct.1 | pct.2 |       |
| CCL20 <sup>+</sup> TAMs   | CCL20                  | 4.547            | 0.476 | 0.116 | 3.671             | 0.680 | 0.178 |       |
|                           | IL1A                   | 3.429            | 0.287 | 0.038 | 3.178             | 0.402 | 0.126 |       |
|                           | INHBA                  | 3.393            | 0.331 | 0.078 | 3.244             | 0.445 | 0.092 |       |
|                           | CXCL3                  | 3.280            | 0.583 | 0.265 | 2.640             | 0.751 | 0.322 |       |
|                           | CXCL2                  | 2.717            | 0.631 | 0.302 | 2.475             | 0.858 | 0.396 |       |
|                           | EREG                   | 2.715            | 0.563 | 0.162 | 2.791             | 0.744 | 0.197 |       |
|                           | CD300E                 | 2.237            | 0.567 | 0.171 | 1.841             | 0.427 | 0.113 |       |
|                           | CCL3                   | 2.133            | 0.684 | 0.432 | 2.691             | 0.918 | 0.452 |       |
|                           | TIMP1                  | 2.097            | 0.924 | 0.670 | 2.902             | 0.956 | 0.535 |       |
|                           | THBS1                  | 1.980            | 0.386 | 0.194 | 1.693             | 0.288 | 0.112 |       |
|                           | CLEC5A                 | 1.969            | 0.477 | 0.217 | 1.813             | 0.274 | 0.109 |       |
|                           | MMP19                  | 1.942            | 0.387 | 0.188 | 1.626             | 0.274 | 0.143 |       |
|                           | HSPH1                  | 1.903            | 0.378 | 0.346 | 1.919             | 0.447 | 0.335 |       |
|                           | EAF1                   | 1.787            | 0.278 | 0.133 | 1.926             | 0.251 | 0.109 |       |
|                           | DNAJB1                 | 1.747            | 0.422 | 0.380 | 1.629             | 0.535 | 0.452 |       |
|                           | CD44                   | 1.729            | 0.937 | 0.667 | 1.660             | 0.937 | 0.599 |       |
|                           | CCL4                   | 1.719            | 0.493 | 0.339 | 1.881             | 0.814 | 0.430 |       |
|                           | OLR1                   | 1.672            | 0.576 | 0.292 | 1.946             | 0.537 | 0.212 |       |
|                           | C15orf48               | 1.659            | 0.810 | 0.563 | 2.365             | 0.905 | 0.448 |       |
|                           | APOE <sup>+</sup> TAMs | PLIN2            | 1.633 | 0.627 | 0.446             | 1.804 | 0.628 | 0.373 |
| SDC4                      |                        | 1.541            | 0.273 | 0.151 | 2.065             | 0.254 | 0.110 |       |
| APOC1                     |                        | 2.531            | 0.835 | 0.258 | 3.568             | 0.796 | 0.157 |       |
| APOE                      |                        | 2.674            | 0.850 | 0.241 | 3.388             | 0.836 | 0.168 |       |
| NUPR1                     |                        | 2.271            | 0.515 | 0.092 | 3.554             | 0.487 | 0.076 |       |
| SPP1                      |                        | 2.31             | 0.779 | 0.264 | 2.848             | 0.581 | 0.122 |       |
| GPNMB                     |                        | 2.54             | 0.908 | 0.239 | 2.558             | 0.760 | 0.173 |       |
| TREM2                     |                        | 2.488            | 0.661 | 0.135 | 2.573             | 0.522 | 0.096 |       |
| MMP12                     |                        | 2.285            | 0.48  | 0.191 | 2.363             | 0.467 | 0.111 |       |
| MSR1                      |                        | 2.281            | 0.721 | 0.193 | 2.212             | 0.580 | 0.143 |       |
| CD9                       |                        | 2.128            | 0.854 | 0.284 | 2.092             | 0.728 | 0.202 |       |
| CTSD                      |                        | 2.043            | 0.992 | 0.605 | 1.685             | 0.951 | 0.504 |       |
| FABP5                     |                        | 1.748            | 0.834 | 0.398 | 1.977             | 0.723 | 0.279 |       |
| MMP14                     |                        | 1.741            | 0.687 | 0.216 | 1.904             | 0.584 | 0.161 |       |
| MMP9                      |                        | 1.501            | 0.529 | 0.201 | 1.872             | 0.574 | 0.158 |       |
| LIPA                      |                        | 1.654            | 0.852 | 0.349 | 1.553             | 0.625 | 0.216 |       |
| ACP5                      |                        | 1.622            | 0.851 | 0.362 | 1.734             | 0.393 | 0.113 |       |
| SLC40A1 <sup>+</sup> TAMs |                        | SEPP1            | 3.315 | 0.375 | 0.133             | 3.330 | 0.293 | 0.100 |
|                           |                        | FOLR2            | 2.222 | 0.291 | 0.120             | 3.991 | 0.586 | 0.080 |
|                           |                        | PDK4             | 2.141 | 0.277 | 0.129             | 3.937 | 0.379 | 0.046 |
|                           | SLC40A1                | 2.586            | 0.517 | 0.190 | 3.260             | 0.743 | 0.128 |       |
|                           | STMN1                  | 2.770            | 0.414 | 0.184 | 2.533             | 0.535 | 0.143 |       |
|                           | GATM                   | 2.236            | 0.291 | 0.110 | 3.065             | 0.387 | 0.058 |       |
|                           | C1QC                   | 1.802            | 0.755 | 0.375 | 3.392             | 0.962 | 0.259 |       |
|                           | GPR34                  | 1.940            | 0.445 | 0.209 | 3.242             | 0.595 | 0.094 |       |
|                           | FUCA1                  | 1.995            | 0.384 | 0.229 | 3.087             | 0.528 | 0.111 |       |
|                           | ENPP2                  | 1.543            | 0.291 | 0.144 | 3.058             | 0.456 | 0.089 |       |
|                           | CKS1B                  | 2.329            | 0.253 | 0.117 | 2.150             | 0.265 | 0.083 |       |
|                           | HIST1H4C               | 2.240            | 0.323 | 0.209 | 2.130             | 0.444 | 0.136 |       |
|                           | C1QB                   | 1.614            | 0.771 | 0.386 | 2.697             | 0.961 | 0.272 |       |
|                           | C1QA                   | 1.606            | 0.792 | 0.415 | 2.472             | 0.968 | 0.292 |       |
|                           | AXL                    | 1.851            | 0.388 | 0.168 | 2.114             | 0.487 | 0.113 |       |
| S100B                     | 1.789                  | 0.331            | 0.145 | 1.666 | 0.297             | 0.079 |       |       |

Abbreviations: log2FC=log2 fold-change;pct.1=the percentage of cells in the cluster where the gene is detected; pct.2=the percentage of cells on average in all the other clusters where the gene is detected.

Supplementary Table S4. Marker Genes for Three TAM subsets (CCL20<sup>+</sup> TAMs, APOE<sup>+</sup> TAMs, and SLC40A1<sup>+</sup> TAMs).

| <b>TAM Subsets</b>        | <b>Marker Genes</b>                                                                                   |
|---------------------------|-------------------------------------------------------------------------------------------------------|
| CCL20 <sup>+</sup> TAMs   | CCL20, IL1A, INHBA, CXCL3, EREG, CXCL2, TIMP1, CCL3, C15orf48, HSPH1, CLEC5A, EAF1, THBS1, OLR1, SDC4 |
| APOE <sup>+</sup> TAMs    | APOE, APOC1, NUPR1, SPP1, GPNMB, TREM2, MMP12, MSR1, CD9, CTSD, FABP5, MMP14, MMP9, LIPA, ACP5        |
| SLC40A1 <sup>+</sup> TAMs | SLC40A1, SEPP1, FOLR2, PDK4, STMN1, GATM, C1QC, GPR34, FUCA1, ENPP2, CKS1B, C1QB, C1QA, AXL, S100B    |
